# Supplementary material for: LIF excitation spectra of jet-cooled 3,5-dicyanoaniline
Source: Royal Society of Chemistry journal article supplement (doi:10.1039/b305797f), 2003-01-01
Supplement: tables.doc [file tables.doc]

**Table I a.** Analysis of the LIF spectra of 3,5-DCA(-NH2).

| **osc*=* |  |  |  | Assign | | |  | *I* */I*00 |  | *Icalc* /*I*0cal0 | *Ifit* */I*0fit0 |
| --- | --- | --- | --- | --- | --- | --- | --- | --- | --- | --- | --- |
| *  *00 | [cm-1] | **osc |  | *CISscaled* |  | No |  | 100 |  | 100 | 100 |
| 0.00 | 0.00 |  |  | 0.0 |  | 00 |  | 100 |  | 100 | 100 |
| 3.34 | 3.3 |  |  |  |  |  |  | 7 |  |  |  |
| 110.67 | 110.7 |  |  | 115.2 |  | 3 |  | 19 |  | 12.8 | 17 |
| 113.65 | 110.7+3.3 | 0.36 |  |  |  |  |  | 2 |  |  |  |
| 195.77 | 195.8 |  |  |  |  |  |  | 1 |  |  |  |
| 221.40 | 2*110.7 | -0.07 |  | 230.4 |  | 2*3 |  | 1 |  | 0.6 | 1.2 |
| 226.08 | 226.1 |  |  | *199.4* |  | *6* |  | 4 |  |  |  |
| 284.39 | 284.4 |  |  |  |  |  |  | 1 |  |  |  |
| 336.33 | 226.1+110.7 | 0.41 |  | *314.6* |  | *3+6* |  | 1 |  |  |  |
| 372.59 | 372.6 |  |  | *368.8* |  | *9* |  | 5 |  |  |  |
| 375.63 | 375.6 |  |  | *396.1* |  | *11* |  | 4 |  |  |  |
| 400.10 | 400.1 |  |  |  |  |  |  | 2 |  |  |  |
| 446.14 | 446.1 |  |  | 444.5 |  | 12 |  | 62 |  | 41.1 | 67.3 |
| 448.52 | 446.1+3.3 | 0.96 |  |  |  |  |  | 3 |  |  |  |
| 457.78 | 457.8 |  |  |  |  |  |  | 1 |  |  |  |
| 502.31 | 502.3 |  |  |  |  |  |  | 2 |  |  |  |
| 508.51 | 508.5 |  |  | 521.1 |  | 14 |  | 32 |  | 53.3 | 30.4 |
| 511.41 | 508.5+3.3 | 0.43 |  |  |  |  |  | 2 |  |  |  |
| 517.62 | 517.6 |  |  | 531.4 |  | 17 |  | 19 |  | 1.2 | 20.4 |
| 520.39 | 520.4 |  |  | *516.9* |  | *16* |  | 9 |  |  |  |
| 527.00 | 527.0 |  |  | *510.9* |  | *15* |  | 2 |  |  |  |
| 557.04 | 110.7+446.1 | -0.23 |  | 559.7 |  | 3+12 |  | 9 |  | 4.6 | 10.5 |
| 560.37 | 446.1+110.7+3.3 | -0.22 |  |  |  |  |  | 1 |  |  |  |
| 618.87 | 110.7+508.5 | 0.31 |  | 636.3 |  | 3+14 |  | 4 |  | 7.3 | 5.6 |
| 628.09 | 110.7+517.6 | 0.20 |  | 646.6 |  | 3+17 |  | 1 |  | 0.1 | 3.4 |
| 630.79 | 520.4+110.7 | 0.27 |  | *632.1* |  | 3+*16* |  | 1 |  |  |  |
| 672.68 | 446.1+226.1 | -0.46 |  | *643.9* |  | *6+*12 |  | 2 |  |  |  |
| 734.45 |  |  |  |  |  |  |  | 1 |  |  |  |
| 775.69 |  |  |  |  |  |  |  | 1 |  |  |  |
| 810.75 | 527.0+284.4 | 0.63 |  |  |  |  |  | 3 |  |  |  |
| 818.61 | 446.1+372.6 | 0.12 |  | *813.3* |  | *9*+12 |  | 3 |  |  |  |
| 823.28 |  |  |  |  |  |  |  | 1 |  |  |  |
| 845.88 | 110.7+226.1+520.4 | -0.63 |  | *831.5* |  | 3+*6+16* |  | 1 |  |  |  |
| 855.18 | 110.7+226.1+520.4 | -0.81 |  | *831.5* |  | 3+*6+16* |  | 2 |  |  |  |
| 891.32 | 2*446.1 | 0.96 |  | 889.0 |  | 2*12 |  | 23 |  | 8.4 | 22.5 |
| 904.06 | 904.1 |  |  |  |  | 2*7 |  | 28 |  | 28 | 28 |
| 913.30 |  |  |  |  |  |  |  | 1 |  |  |  |
| 919.98 |  |  |  |  |  |  |  | 1 |  |  |  |
| 939.83 |  |  |  |  |  |  |  | 5 |  |  |  |
| 941.55 | 941.6 |  |  | *977.2* |  | *25* |  | 14 |  |  |  |
| 946.89 | 946.9 |  |  | 971.5 |  | 24 |  | 13 |  | 5.1 | 11.9 |
| 954.08 | 446.1+508.5 | 0.57 |  | 965.6 |  | 12+14 |  | 23 |  | 22.5 | 21 |
| 956.54 | 956.5 |  |  | 939.4 |  | 23 |  | 43 |  | 26.4 | 39.6 |
| 959.61 |  |  |  |  |  |  |  | 1 |  |  |  |
| 962.47 | 446.1+517.6 | 1.29 |  | 975.9 |  | 12+17 |  | 15 |  | 0.5 | 13.5 |
| 966.56 | 446.1+520.4 | -0.03 |  | *961.1* |  | 12+*16* |  | 4 |  |  |  |
| 971.21 | 446.1+527.0 | 1.93 |  | *955.4* |  | 12+*15* |  | 2 |  |  |  |
| 980.44 |  |  |  |  |  |  |  | 1 |  |  |  |
| 993.72 |  |  |  |  |  |  |  | 1 |  |  |  |
| 1002.93 | 110.7+2*446.1 | 0.02 |  | 1004.2 |  | 3+2*12 |  | 1 |  | 0.8 | 3.2 |
| 1005.28 |  |  |  |  |  |  |  | 4 |  |  |  |
| 1014.61 | 904.1+110.7 | 0.12 |  |  |  | 3+2*7 |  | 4 |  | 3.6 | 4.8 |
| 1016.65 | 2*508.5 | 0.37 |  | 1042.2 |  | 2*14 |  | 2 |  | 13.3 | 4.1 |
| 1026.06 | 508.5+517.6 | 0.07 |  | 1052.5 |  | 17+14 |  | 2 |  | 0.6 | 6.2 |
| 1028.67 | 508.5+520.4 | 0.23 |  | *1038.0* |  | 14+*16* |  | 2 |  |  |  |
| 1035.13 | 508.5+527.0 | 0.38 |  | *1032.0* |  | 14+*15* |  | 2 |  |  |  |
| 1045.96 |  |  |  |  |  |  |  | 1 |  |  |  |
| 1052.10 | 941.6+110.7 | 0.12 |  | *1092.4* |  | 3+*25* |  | 2 |  |  |  |
| 1057.07 | 110.7+946.9 | 0.49 |  | 1086.7 |  | 3+24 |  | 2 |  | 0.5 | 1.8 |
| 1064.89 | 110.7+446.1+508.5 | 0.43 |  | 1080.8 |  | 3+12+14 |  | 5 |  | 2.7 | 3.6 |
| 1067.16 | 110.7+956.5 | 0.05 |  | 1054.6 |  | 3+23 |  | 5 |  | 3.5 | 6.9 |
| 1073.66 | 110.7+446.1+517.6 | 0.77 |  | 1091.1 |  | 3+12+17 |  | 2 |  | <0.1 | 2.1 |
| 1122.99 | 1123.0 |  |  |  |  |  |  | 3 |  |  |  |
|  | 110.7+2*508.5 |  |  | 1157.4 |  | 3+2*14 |  |  |  | 2 | 0.8 |
| 1170.41 |  |  |  |  |  |  |  | 1 |  |  |  |
| 1173.18 | 1173.2 |  |  | 1170.7 |  | 27 |  | 9 |  | 2.1 | 5.9 |
| 1174.59 |  |  |  |  |  |  |  | 2 |  |  |  |
| 1183.17 | 956.5+226.1 | -0.55 |  | *1138.8* |  | *6*+23 |  | 4 |  |  |  |
| 1312.04 | 1312.0 |  |  | 1335.7 |  | 30 |  | 3 |  | 8 | 3.4 |
| 1328.29 |  |  |  |  |  |  |  | 3 |  |  |  |
| 1331.98 |  |  |  |  |  |  |  | 1 |  |  |  |
| 1335.81 | 3*446.1 | 2.61 |  | 1333.5 |  | 3*12 |  | 3 |  | 1.1 | 5 |
| 1349.91 | 904.1+446.1 | 0.29 |  |  |  | 2*7+12 |  | 15 |  | 11.5 | 18.8 |
| 1382.63 |  |  |  |  |  |  |  | 1 |  |  |  |
| 1387.31 | 941.6+446.1 | 0.38 |  | *1421.7* |  | 12+*25* |  | 14 |  |  |  |
| 1390.33 | 1390.3 |  |  | 1404.1 |  | 31 |  | 25 |  | 30.6 | 23 |
| 1392.75 | 946.9+446.1 | 0.28 |  | 1416 |  | 12+24 |  | 5 |  | 2 | 7.9 |
| 1398.57 | 2*446.1+508.5 | 2.22 |  | 1410.1 |  | 2*12+14 |  | 7 |  | 4.7 | 7.2 |
| 1402.78 | 446.1+956.5 | -0.10 |  | 1383.9 |  | 12+23 |  | 28 |  | 11 | 26.9 |
| 1405.16 |  |  |  |  |  |  |  | 2 |  |  |  |
| 1411.78 | 2*446.1+517.6 | -1.88 |  | 1420.4 |  | 2*12+17 |  | 4 |  | 0.1 | 4.5 |
| 1411.78 | 904.1+508.5 | 0.79 |  |  |  | 2*7+14 |  |  |  | 14.9 | 8.5 |

Paper: LIF excitaion of jet-cooled 3,5-dicyanoaniline (P.Kolek, K.Pirowska, L.Chacaga, J.Najbar)

Electronic Supplemetary Information Table Ia and Ib

**Table I a.** Analysis of the LIF spectra of 3,5-DCA(-NH2) - continued

| **osc*=* |  |  |  | Assign | | | | |  | *I* */I*00 |  | *Icalc* /*I*0cal0 | *Ifit* */I*0fit0 |
| --- | --- | --- | --- | --- | --- | --- | --- | --- | --- | --- | --- | --- | --- |
| *  *00 | [cm-1] | **osc |  | *CISscaled* | |  | | No |  | 100 |  | 100 | 100 |
| 1411.78 | 2*446.1+517.6 | -1.88 |  | 1420.4 |  | | 2*12+17 | |  | 4 |  | 0.1 | 4.5 |
| 1411.78 | 904.1+508.5 | 0.79 |  |  |  | | 2*7+14 | |  |  |  | 14.9 | 8.5 |
| 1413.80 | 2*446.1+520.4 | -1.13 |  | *1405.9* |  | | 2*12+*16* | |  | 2 |  |  |  |
| 1421.60 | 904.1+517.6 | 0.08 |  |  |  | | 2*7+17 | |  | 6 |  | 0.3 | 5.7 |
| 1449.36 | 508.5+941.6 | 0.70 |  | *1498.3* |  | | 14+*25* | |  | 3 |  |  |  |
|  | 110.7+1312.0 |  |  | 1450.9 |  | | 3+30 | |  |  |  | 0.9 | 0.4 |
| 1464.46 | 956.5+508.5 | 0.59 |  | 1460.5 |  | | 14+23 | |  | 12 |  | 13.5 | 11.5 |
| 1464.46 | 946.9+517.6 | 0.05 |  | 1502.9 |  | | 17+24 | |  |  |  | <0.1 | 2.3 |
| 1469.35 |  |  |  |  |  | |  | |  | 5 |  |  |  |
| 1473.22 | 446.1+508.5+517.6 | -0.95 |  | 1497.0 |  | | 12+17+14 | |  | 9 |  | 0.3 | 4.3 |
| 1475.20 | 446.1+508.5+520.4 | -0.16 |  | *1492.8* |  | | 12+17+*16* | |  | 6 |  |  |  |
| 1478.26 | 956.5+520.4 | -1.33 |  | *1456.3* |  | | *16*+23 | |  | 1 |  |  |  |
|  | 446.1+2*508.5 |  |  | 1486.7 |  | | 12+2*14 | |  |  |  | 5.8 | 2.9 |
|  | 508.5+946.9 |  |  | 1492.6 |  | | 14+24 | |  |  |  | 2.5 | 3.4 |
| 1500.58 | 446.1+946.9 +110.7 | 3.12 |  | 1531.2 |  | | 3+12+24 | |  | 2 |  | 0.2 | 1.1 |
| 1500.58 | 446.1+941.6+110.7 | -2.22 |  | *1536.9* |  | | 3+12+*25* | |  | 2 |  |  |  |
|  | 110.7+1390.3 |  |  | 1519.3 |  | | 3+31 | |  | 2 |  | 3.9 | 3.9 |
| 1513.52 | 110.7+446.1+956.5 | -2.06 |  | 1499.1 |  | | 3+12+23 | |  | 4 |  | 1.3 | 4.3 |
| 1513.52 | 110.7+2*446.1+508.5 | -0.17 |  | 1525.3 |  | | 3+2*12+14 | |  | 4 |  | 0.5 | 1.1 |
| 1528.71 |  |  |  |  |  | |  | |  | 4 |  |  |  |
| 1568.67 | 446.1+1123.0 | 0.46 |  |  |  | |  | |  | 1 |  |  |  |
| 1575.07 | 110.7+508.5+956.5 | 0.53 |  | 1575.7 |  | | 3+14+23 | |  | 2 |  | 1.9 | 2.2 |
|  | 110.7+446.1+2*508.5 |  |  | 1601.9 |  | | 3+12+2*14 | |  |  |  | 0.8 | 0.5 |
| 1615.25 |  |  |  |  |  | |  | |  | 2 |  |  |  |
| 1619.14 | 446.1+1173.2 | 0.18 |  | 1615.2 |  | | 12+27 | |  | 4 |  | 0.8 | 3.7 |
|  | 508.5+1173.2 |  |  | 1691.8 |  | | 14+27 | |  |  |  | 1.1 | 1.7 |
|  | 446.1+1312.0 |  |  | 1780.2 |  | | 12+30 | |  |  |  | 3 | 2 |
| 1794.61 | 904.1+2*446.1 | 1.73 |  |  |  | | 2*7+2*12 | |  | 2 |  | 2.4 | 6.3 |
| 1832.07 | 2*446.1+941.6 | 1.76 |  | *1866.2* |  | | 2*12+*25* | |  | 2 |  |  |  |
| 1833.93 |  |  |  |  |  | |  | |  | 2 |  |  |  |
| 1836.07 | 2*446.1+946.9 | 3.10 |  | 1860.5 |  | | 2*12+24 | |  | 19 |  | 0.4 | 9.1 |
| 1841.95 | 3*446.1+508.5 | 4.98 |  | 1854.6 |  | | 3*12+14 | |  | 1 |  | 0.7 | 1.7 |
| 1848.21 | 2*446.1+956.5 | 0.61 |  | 1828.4 |  | | 2*12+23 | |  | 6 |  | 2.3 | 9.1 |
|  | 446.1+1390.3 |  |  | 1848.6 |  | | 12+31 | |  |  |  | 12.6 | 15.4 |
|  | 508.5+1312.0 |  |  | 1856.8 |  | | 14+30 | |  |  |  | 4.7 | 1.2 |
| 1858.00 | 446.1+904.1+508.5 | 0.71 |  |  |  | | 2*7+12+14 | |  | 7 |  | 6.3 | 3.8 |
| 1860.63 | 904.1+956.5 | -0.03 |  |  |  | | 2*7+23 | |  | 4 |  | 7.4 | 11.1 |
| 1894.73 | 446.1+508.5+941.6 | 1.47 |  | *1942.8* |  | | 12+14+*25* | |  | 1 |  |  |  |
| 1898.39 | 446.1+508.5+946.9 | 3.15 |  | 1937.1 |  | | 12+14+24 | |  | 6 |  | 1 | 2.3 |
| 1898.39 | 956.5+941.6 | -0.30 |  | *1948.7* |  | | 24+*25* | |  | 6 |  |  |  |
| 1902.53 | 956.5+946.9 | 0.90 |  | 1910.9 |  | | 23+24 | |  | 4 |  | 1.4 | 4.8 |
| 1905.76 |  |  |  |  |  | |  | |  | 2 |  |  |  |
| 1910.52 | 2*956.5 | 2.56 |  | 1878.8 |  | | 2*23 | |  | 9 |  | 3.1 | 7.2 |
| 1911.89 | 446.1+508.5+956.5 | -0.70 |  | 1905.0 |  | | 12+14+23 | |  | 5 |  | 5.8 | 8 |
| 1918.77 | 2*446.1+508.5+517.6 | -0.36 |  | 1941.5 |  | | 2*12+14+17 | |  | 5 |  | <0.1 | 1.4 |
| 1918.77 | 904.1+2*508.5 | 2.31 |  |  |  | | 2*7+2*14 | |  | 5 |  | 3.7 | 1.1 |
| 1918.77 | 446.1+517.6+956.5 | 1.53 |  | 1918.8 |  | | 12+17+23 | |  | 5 |  | 0.1 | 5.5 |
| 1924.69 | 446.1+520.4+956.5 | -1.62 |  |  |  | |  | |  | 14 |  |  |  |
|  | 508.5+1390.3 |  |  | 1925.2 |  | | 14+31 | |  |  |  | 16.1 | 6.9 |
|  | 2*446.1+2*508.5 |  |  | 1931.2 |  | | 2*12+2*14 | |  |  |  | 1.2 | 1 |
|  | 517.6+1390.3 |  |  | 1935.5 |  | | 17+31 | |  |  |  | 0.5 | 5.2 |
| 1960.08 | 2*508.5+941.6 | -1.51 |  | *2019.4* |  | | 2*14+*25* | |  | 2 |  |  |  |
|  |  |  |  | 1963.8 |  | | 3+12+31 | |  |  |  | 1.4 | 2.4 |
|  |  |  |  | 1981.6 |  | | 2*14+23 | |  |  |  | 3.2 | 1.5 |
|  |  |  |  | 2040.4 |  | | 3+14+31 | |  |  |  | 2.2 | 1.3 |
| 1984.93 | 956.5+508.5+520.4 | 0.51 |  |  |  | |  | |  | 1 |  |  |  |
| 2096.94 |  |  |  |  |  | |  | |  | 5 |  |  |  |
| 2128.61 | 956.5+1173.2 | 1.11 |  | 2142.2 |  | | 24+27 | |  | 4 |  | <0.1 | 0.5 |
|  | 444.5+508.5+1173.2 |  |  | 2136.3 |  | | 12+14+27 | |  |  |  | 0.4 | 1.1 |
|  | 2*110.7+508.5+1390.3 |  |  | 2155.6 |  | | 2*3+14+31 | |  |  |  | 0.1 | 0.1 |
| 2190.61 |  |  |  |  |  | |  | |  | 2 |  |  |  |
| 2192.99 |  |  |  |  |  | |  | |  | 2 |  |  |  |
| 2239.26 | 904.1+3*446.1 | 3.22 |  |  |  | | 2*7+3*12 | |  | 2 |  | 0.3 | 1.4 |
|  | 2*508.5+1170.7 |  |  | 2212.9 |  | | 2*14+27 | |  |  |  | 0.3 | 0.2 |
|  | 2*446.1+1312.0 |  |  | 2224.7 |  | | 2*12+30 | |  |  |  | 0.5 | 0.6 |
| 2250.52 |  |  |  |  |  | |  | |  | 2 |  |  |  |
|  | 956.5+1312.0 |  |  | 2275.1 |  | | 23+30 | |  |  |  | 1.9 | 1.1 |
|  | 2*446.1+1390.3 |  |  | 2293.1 |  | | 2*12+31 | |  |  |  | 2.6 | 5.2 |
|  | 446.1+508.5+1312.0 |  |  | 2301.3 |  | | 12+14+30 | |  |  |  | 1.8 | 0.7 |
|  | 446.1+2*956.5 |  |  | 2323.3 |  | | 12+2*23 | |  |  |  | 1.3 | 5 |
|  | 2*446.1+508.5_956.5 |  |  | 2349.5 |  | | 2*12+14+23 | |  |  |  | 1.2 | 2.8 |

**Table I b.** Analysis of the LIF spectra of 3,5-DCA(-ND2).

| **osc*=* |  |  |  | Assign | | |  | *I* */I*00 |  | *Icalc* /*I*0cal0 | *Ifit* */I*0fit0 |
| --- | --- | --- | --- | --- | --- | --- | --- | --- | --- | --- | --- |
| *  *00 | [cm-1] | **osc |  | *CISscaled* |  | No |  | 100 |  | 100 | 100 |
| 0.00 | 00 D2 |  |  | 0.0 |  |  |  | 100 |  | 100 | 100 |
| 3.27 |  |  |  |  |  |  |  | 9 |  |  |  |
| 6.46 | 00 HD |  |  |  |  |  |  | 5 |  |  |  |
| 36.00 |  |  |  |  |  |  |  | 2 |  |  |  |
| 110.49 | 110.5 |  |  | 115.0 |  | 3 |  | 17 |  | 12.7 | 15.2 |
| 114.01 |  |  |  |  |  |  |  | 1 |  |  |  |
| 116.96 | 110.5 HD |  |  |  |  |  |  | 2 |  |  |  |
| 127.63 |  |  |  |  |  |  |  | 1 |  |  |  |
| 222.50 | 222.5 |  |  | 197.8 |  | 6 |  | 5 |  |  |  |
|  |  |  |  | 230.0 |  | 2*3 |  |  |  | 0.6 | 1.4 |
| 230.71 | 224.3 HD |  |  |  |  |  |  | 1 |  |  |  |
| 274.81 | 274.8 |  |  |  |  |  |  | 1 |  |  |  |
| 332.74 | 110.5+222.5 | 0.25 |  | 312.8 |  | 3+6 |  | 1 |  |  |  |
| 357.35 | 357.4 |  |  | 336.4 |  | 9 |  | 1 |  |  |  |
| 371.14 |  |  |  |  |  |  |  | 1 |  |  |  |
| 373.48 | 373.5 |  |  | 394.1 |  | 11 |  | 6 |  |  |  |
| 381.01 | 374.6 HD |  |  |  |  |  |  | 1 |  |  |  |
| 388.85 |  |  |  |  |  |  |  | <1 |  |  |  |
| 397.37 |  |  |  |  |  |  |  | 2 |  |  |  |
| 421.57 |  |  |  |  |  |  |  | 2 |  |  |  |
| 428.94 |  |  |  |  |  |  |  | 1 |  |  |  |
| 437.33 |  |  |  |  |  |  |  | <1 |  |  |  |
| 444.47 | 2*222.5 | 0.53 |  | 395.6 |  | 2*6 |  | 28 |  |  |  |
| 446.01 | 446.0 |  |  | 444.4 |  | 12 |  | 63 |  | 41.2 | 75.4 |
| 448.64 |  |  |  |  |  |  |  | 2 |  |  |  |
| 452.37 | 445.9 HD |  |  |  |  |  |  | 8 |  |  |  |
| 457.20 |  |  |  |  |  |  |  | 1 |  |  |  |
| 471.25 |  |  |  |  |  |  |  | 1 |  |  |  |
| 479.99 | 480.0 |  |  |  |  |  |  | 4 |  |  |  |
| 483.67 |  |  |  |  |  |  |  | 1 |  |  |  |
| 490.70 | 490.7 |  |  |  |  |  |  | 6 |  |  |  |
| 503.78 | 503.8 |  |  | 505.8 |  | 14 |  | 35 |  | 3.3 | 40.8 |
| 506.33 | 506.3 |  |  | 530.6 |  | 17 |  | 15 |  | 47.1 | 22.9 |
| 509.24 | 509.2 |  |  |  |  |  |  | 23 |  |  |  |
| 512.83 | 506.4 HD |  |  |  |  |  |  | 5 |  |  |  |
| 515.62 | 509.2 HD |  |  |  |  |  |  | 4 |  |  |  |
| 520.23 | 513.8 HD |  |  |  |  |  |  | 2 |  |  |  |
| 527.53 | 527.5 |  |  | 510.5 |  | 16 |  | 10 |  |  |  |
| 535.03 |  |  |  |  |  |  |  | 1 |  |  |  |
| 536.98 |  |  |  |  |  |  |  | 1 |  |  |  |
| 548.15 |  |  |  |  |  |  |  | 2 |  |  |  |
| 554.45 | 2*222.5+110.5 | 1.04 |  | 510.6 |  | 3+2*6 |  | 2 |  |  |  |
| 556.74 | 446.0+110.5 | -0.24 |  | 559.4 |  | 3+12 |  | 12 |  | 4.6 | 12.4 |
| 563.96 | 445.9+110.5 HD | -1.08 |  |  |  |  |  | 5 |  |  |  |
| 613.90 | 110.5+503.8 | 0.37 |  | 620.8 |  | 3+14 |  | 6 |  | 0.4 | 3.4 |
| 616.66 | 110.5+506.3 | 0.16 |  | 645.6 |  | 3+17 |  | 2 |  | 6 | 6.3 |
| 619.49 | 110.5+509.2 | 0.24 |  |  |  |  |  | 5 |  |  |  |
| 622.91 | 110.5+506.4 HD | 0.41 |  |  |  |  |  | 1 |  |  |  |
| 625.88 | 110.5+509.2 HD | 0.25 |  |  |  |  |  | 1 |  |  |  |
| 638.19 | 110.5+527.5 | -0.17 |  | 625.5 |  | 3+16 |  | 1 |  |  |  |
| 661.53 |  |  |  |  |  |  |  | 2 |  |  |  |
| 669.22 |  |  |  |  |  |  |  | 4 |  |  |  |
| 672.47 | 672.5 |  |  |  |  | 2*7 |  | 47 |  | 47 | 44.2 |
|  |  |  |  | 674.4 |  | 2*3+12 |  |  |  | 0.2 | 1.2 |
| 675.27 |  |  |  |  |  |  |  | 3 |  |  |  |
| 678.54 |  |  |  |  |  |  |  | 1 |  |  |  |
| 707.68 |  |  |  |  |  |  |  | 2 |  |  |  |
| 719.41 | 719.4 |  |  | 817.0 |  | 21 |  | 34 |  |  |  |
| 722.65 |  |  |  |  |  |  |  | 4 |  |  |  |
| 728.94 |  |  |  |  |  |  |  | 1 |  |  |  |
| 731.68 |  |  |  |  |  |  |  | 1 |  |  |  |
| 740.28 |  |  |  |  |  |  |  | 3 |  |  |  |
| 754.93 |  |  |  |  |  |  |  | 5 |  |  |  |
|  |  |  |  | 760.6 |  | 2*3+17 |  |  |  | 0.3 | 0.3 |
| 763.42 | 757.0 HD |  |  |  |  |  |  | 5 |  |  |  |
| 768.22 |  |  |  |  |  |  |  | 1 |  |  |  |
| 782.76 | 672.5+110.5 | 0.20 |  |  |  | 3+2*7 |  | 7 |  | 6.0 | 6.7 |
| 794.89 |  |  |  |  |  |  |  | 1 |  |  |  |
| 812.00 |  |  |  |  |  |  |  | 3 |  |  |  |
| 816.51 |  |  |  |  |  |  |  | 1 |  |  |  |
| 818.23 |  |  |  |  |  |  |  | 1 |  |  |  |
| 825.93 |  |  |  |  |  |  |  | 7 |  |  |  |
| 829.69 | 719.4+110.5 | 0.21 |  | 932.0 |  | 3+21 |  | 5 |  |  |  |
| 834.45 |  |  |  |  |  |  |  | 3 |  |  |  |
| 837.15 |  |  |  |  |  |  |  | 2 |  |  |  |
| 838.16 |  |  |  |  |  |  |  | 2 |  |  |  |
| 842.72 |  |  |  |  |  |  |  | 1 |  |  |  |
| 850.58 |  |  |  |  |  |  |  | 1 |  |  |  |
| 850.59 |  |  |  |  |  |  |  | 1 |  |  |  |
| 862.81 |  |  |  |  |  |  |  | 2 |  |  |  |
| 870.38 |  |  |  |  |  |  |  | 2 |  |  |  |

**Table I b.** Analysis of the LIF spectra of 3,5-DCA(-ND2), continued.

| **osc*=* |  |  |  | Assign | | |  | *I* */I*00 |  | *Icalc* /*I*0cal0 | *Ifit* */I*0fit0 |
| --- | --- | --- | --- | --- | --- | --- | --- | --- | --- | --- | --- |
| *  *00 | [cm-1] | **osc |  | *CISscaled* |  | No |  | 100 |  | 100 | 100 |
| 875.39 |  |  |  |  |  |  |  | 2 |  |  |  |
| 885.69 |  |  |  |  |  |  |  | 1 |  |  |  |
| 886.95 |  |  |  |  |  |  |  | 1 |  |  |  |
| 890.26 | 2*446.0 | 1.76 |  | 888.8 |  | 2*12 |  | 34 |  | 8.4 | 28.6 |
| 892.22 |  |  |  |  |  |  |  | 9 |  |  |  |
| 894.47 |  |  |  |  |  |  |  | 9 |  |  |  |
| 897.27 |  |  |  |  |  |  |  | 5 |  |  |  |
| 908.26 |  |  |  |  |  |  |  | 1 |  |  |  |
| 922.51 |  |  |  |  |  |  |  | 5 |  |  |  |
| 929.40 |  |  |  |  |  |  |  | 3 |  |  |  |
| 936.49 |  |  |  |  |  |  |  | 1 |  |  |  |
| 938.26 | 446.0+490.7 | -1.55 |  |  |  |  |  | 2 |  |  |  |
| 940.26 |  |  |  |  |  |  |  | 1 |  |  |  |
| 944.34 | 944.3 |  |  | 963.7 |  | 25 |  | 11 |  | 19.0 | 9.6 |
| 946.01 |  |  |  |  |  |  |  | 7 |  |  |  |
| 949.69 |  |  |  |  |  |  |  | 24 |  |  |  |
| 950.77 | 446.0+503.8 | -0.98 |  | 950.2 |  | 12+14 |  | 39 |  | 1.5 | 30.1 |
| 952.40 | 446.0+506.3 | -0.06 |  | 975.0 |  | 12+17 |  | 28 |  | 19.6 | 17.2 |
| 955.17 | 446.0+509.2 | 0.08 |  | 953.3 |  | 12+15 |  | 5 |  |  |  |
| 960.29 | 960.3 |  |  | 934.7 |  | 24 |  | 49 |  | 13.4 | 52.5 |
| 962.22 |  |  |  |  |  |  |  | 37 |  |  |  |
| 964.46 | 958.0 HD |  |  |  |  |  |  | 17 |  |  |  |
| 969.67 |  |  |  |  |  |  |  | 8 |  |  |  |
| 972.45 |  |  |  |  |  |  |  | <1 |  |  |  |
| 977.71 |  |  |  |  |  |  |  | 1 |  |  |  |
| 985.64 |  |  |  |  |  |  |  | 3 |  |  |  |
| 989.79 |  |  |  |  |  |  |  | 4 |  |  |  |
| 995.82 |  |  |  |  |  |  |  | 1 |  |  |  |
| 1001.47 | 2*446.0+110.5 | 1.04 |  | 1003.8 |  | 3+2*12 |  | 9 |  | 0.8 | 5.1 |
| 1004.77 |  |  |  |  |  |  |  | 5 |  |  |  |
| 1009.22 | 503.8+506.3 | 0.89 |  | 1036.4 |  | 17+14 |  | 14 |  | 2 | 8.4 |
| 1009.22 | 2*445.9+110.5 HD | -0.43 |  |  |  |  |  | 14 |  |  |  |
| 1012.36 |  |  |  |  |  |  |  | 4 |  |  |  |
| 1015.02 |  |  |  |  |  |  |  | 2 |  |  |  |
| 1018.03 |  |  |  |  |  |  |  | 1 |  |  |  |
| 1020.28 |  |  |  |  |  |  |  | 1 |  |  |  |
| 1031.69 | 922.5+110.5 | 1.31 |  |  |  |  |  | 2 |  |  |  |
|  |  |  |  | 1061.2 |  | 2*17 |  |  |  | 11.1 | 2.6 |
|  |  |  |  | 1120.8 |  | 27 |  |  |  | 1.6 | <0.1 |
| 1033.97 |  |  |  |  |  |  |  | 1 |  |  |  |
| 1036.86 |  |  |  |  |  |  |  | 1 |  |  |  |
| 1054.61 | 944.3+110.5 | 0.22 |  | 1057.5 |  | 3+25 |  | 1 |  | 2 | 1.8 |
| 1061.74 | 446.0+503.8+110.5 | -1.46 |  | 1065.2 |  | 3+12+14 |  | 7 |  | 0.2 | 5 |
| 1062.79 | 446.0+506.3+110.5 | 0.04 |  | 1090.0 |  | 3+12+17 |  | 5 |  | 2.2 | 2.8 |
| 1070.80 | 960.3+110.5 | -0.02 |  | 1049.7 |  | 3+24 |  | 7 |  | 2.2 | 6.9 |
| 1072.58 | 962.2+110.5 | 0.13 |  |  |  |  |  | 6 |  |  |  |
| 1075.15 | 958.0+110.5 HD | -0.20 |  |  |  |  |  | 1 |  |  |  |
| 1080.79 |  |  |  |  |  |  |  | 1 |  |  |  |
| 1089.96 |  |  |  |  |  |  |  | 1 |  |  |  |
| 1096.13 |  |  |  |  |  |  |  | <1 |  |  |  |
| 1100.12 |  |  |  |  |  |  |  | 1 |  |  |  |
| 1105.70 |  |  |  |  |  |  |  | 1 |  |  |  |
| 1107.89 |  |  |  |  |  |  |  | 1 |  |  |  |
| 1107.90 | 655.1+445.9 HD | -0.45 |  |  |  |  |  | 2 |  |  |  |
| 1113.52 |  |  |  |  |  |  |  | 5 |  |  |  |
| 1116.89 | 672.5+446.0 | 1.59 |  |  |  | 2*7+12 |  | 31 |  | 19.4 | 33.3 |
| 1119.52 |  |  |  |  |  |  |  | 2 |  |  |  |
| 1123.85 |  |  |  |  |  |  |  | 8 |  |  |  |
| 1127.42 |  |  |  |  |  |  |  | <1 |  |  |  |
| 1129.10 |  |  |  |  |  |  |  | 1 |  |  |  |
| 1147.26 |  |  |  |  |  |  |  | 3 |  |  |  |
| 1149.88 |  |  |  |  |  |  |  | 2 |  |  |  |
|  |  |  |  | 1151.4 |  | 3+17+14 |  |  |  | 0.2 | 1.3 |
| 1155.59 |  |  |  |  |  |  |  | 2 |  |  |  |
| 1164.52 | 719.4+446.0 | 0.90 |  |  |  |  |  | 44 |  |  |  |
|  |  |  |  | 1164.7 |  | 2*3+24 |  |  |  | 0.1 | 0.6 |
| 1169.44 |  |  |  |  |  |  |  | 4 |  |  |  |
| 1173.08 | 672.5+503.8 | 3.17 |  |  |  | 2*7+14 |  | 10 |  | 1.6 | 18 |
|  |  |  |  | 1176.2 |  | 3+2*17 |  |  |  | 1.4 | 0.4 |
| 1176.84 | 672.5+506.3 | 1.96 |  |  |  | 2*7+17 |  | 18 |  | 22.2 | 10.1 |
| 1180.40 | 672.5+509.2 | 1.31 |  |  |  |  |  | 15 |  |  |  |
| 1182.06 |  |  |  |  |  |  |  | 3 |  |  |  |
| 1186.15 |  |  |  |  |  |  |  | 2 |  |  |  |
| 1189.13 |  |  |  |  |  |  |  | 3 |  |  |  |
|  |  |  |  | 1193.7 |  | 2*3+25 |  |  |  | 0.1 | 0.2 |
| 1197.18 |  |  |  |  |  |  |  | 4 |  |  |  |
| 1198.76 | 672.5+527.53 | 1.24 |  |  |  | 2*7+16 |  | 4 |  |  |  |
| 1202.15 |  |  |  |  |  |  |  | 1 |  |  |  |
| 1204.33 |  |  |  |  |  |  |  | 5 |  |  |  |
|  |  |  |  | 1205.0 |  | 2*3+12+17 |  |  |  | 0.1 | 0.3 |
| 1209.32 |  |  |  |  |  |  |  | 7 |  |  |  |

**Table I b.** Analysis of the LIF spectra of 3,5-DCA(-ND2), continued.

| **osc*=* |  |  |  | Assign | | |  | *I* */I*00 |  | *Icalc* /*I*0cal0 | *Ifit* */I*0fit0 |
| --- | --- | --- | --- | --- | --- | --- | --- | --- | --- | --- | --- |
| *  *00 | [cm-1] | **osc |  | *CISscaled* |  | No |  | 100 |  | 100 | 100 |
| 1210.63 |  |  |  |  |  |  |  | 1 |  |  |  |
| 1212.77 |  |  |  |  |  |  |  | 1 |  |  |  |
| 1215.71 |  |  |  |  |  |  |  | 2 |  |  |  |
| 1219.28 | 719.4+503.8 | 3.91 |  | 1322.8 |  | 21+14 |  | 34 |  |  |  |
| 1220.82 |  |  |  |  |  |  |  | 13 |  |  |  |
| 1223.69 | 719.4+506.3 | 2.05 |  | 1347.6 |  | 21+17 |  | 2 |  |  |  |
| 1227.68 | 719.4+509.2 | 0.97 |  |  |  |  |  | 13 |  |  |  |
|  |  |  |  | 1235.8 |  | 3+27 |  |  |  | 0.5 | <0.1 |
| 1238.05 |  |  |  |  |  |  |  | 1 |  |  |  |
| 1240.14 |  |  |  |  |  |  |  | 7 |  |  |  |
| 1243.92 |  |  |  |  |  |  |  | 2 |  |  |  |
| 1249.58 |  |  |  |  |  |  |  | 2 |  |  |  |
| 1257.16 |  |  |  |  |  |  |  | 4 |  |  |  |
| 1268.89 |  |  |  |  |  |  |  | 1 |  |  |  |
| 1272.09 |  |  |  |  |  |  |  | 5 |  |  |  |
| 1275.53 |  |  |  |  |  |  |  | 4 |  |  |  |
|  |  |  |  | 1291.2 |  | 2*3+2*17 |  |  |  | 0.1 | <0.1 |
| 1313.06 |  |  |  |  |  |  |  | 1 |  |  |  |
| 1315.34 |  |  |  |  |  |  |  |  |  |  |  |
| 1330.13 |  |  |  |  |  |  |  | 4 |  |  |  |
| 1334.68 | 3*446.0 | 3.35 |  | 1333.2 |  | 3*12 |  | 10 |  | 1.3 | 7.3 |
| 1339.34 |  |  |  |  |  |  |  | 2 |  |  |  |
| 1341.39 | 3*445.9 HD | 2.80 |  |  |  |  |  | 5 |  |  |  |
|  |  |  |  | 1343.7 |  | 31 |  |  |  | 1.5 | 0.3 |
| 1356.33 |  |  |  |  |  |  |  | 3 |  |  |  |
| 1359.25 |  |  |  |  |  |  |  | 2 |  |  |  |
| 1384.79 | 2*446.0+490.7 | -2.07 |  |  |  |  |  | 1 |  |  |  |
| 1390.59 | 446.0+944.3 | -0.24 |  | 1408.1 |  | 12+25 |  | 5 |  | 7.8 | 7.3 |
| 1390.59 | 672.5+719.4 | 1.29 |  |  |  |  |  | 5 |  |  |  |
| 1395.93 | 2*446.0+503.8 | -0.13 |  | 1394.6 |  | 2*12+14 |  | 1 |  | 0.4 | 11.1 |
| 1397.35 | 2*446.0+506.3 | 1.00 |  | 1419.4 |  | 2*12+17 |  | 11 |  | 4.2 |  |
| 1399.14 | 2*446.0+509.2 | 2.12 |  |  |  |  |  | 5 |  |  |  |
| 1404.79 |  |  |  |  |  |  |  | 13 |  |  |  |
| 1406.32 | 446.0+960.3 | -0.02 |  | 1379.1 |  | 12+24 |  | 52 |  | 5.7 | 39.2 |
| 1409.46 | 446.0+962.2 | -1.23 |  |  |  |  |  | 1 |  |  |  |
| 1409.46 | 445.9+958.0 HD | 0.90 |  |  |  |  |  | 1 |  |  |  |
| 1411.53 | 445.9+958.0 HD | -1.17 |  |  |  |  |  | 23 |  |  |  |
| 1415.37 |  |  |  |  |  |  |  | 5 |  |  |  |
| 1418.62 |  |  |  |  |  |  |  | 9 |  |  |  |
| 1422.54 |  |  |  |  |  |  |  | 16 |  |  |  |
| 1423.70 | 1423.7 |  |  | 1415.1 |  | 32 |  | 29 |  | 30.8 | 27.5 |
| 1429.62 |  |  |  |  |  |  |  | <1 |  |  |  |
| 1431.03 |  |  |  |  |  |  |  | 5 |  |  |  |
| 1433.95 |  |  |  |  |  |  |  | 1 |  |  |  |
| 1435.30 |  |  |  |  |  |  |  | 2 |  |  |  |
| 1438.39 | 2*719.4 | 0.43 |  | 1634.0 |  | 2*21 |  | <1 |  |  |  |
| 1446.73 |  |  |  |  |  |  |  | <1 |  |  |  |
| 1449.11 | 3*446.0+110.5 | -0.59 |  | 1448.2 |  | 3+3*12 |  | <1 |  | 0.2 | 1.4 |
| 1451.10 |  |  |  |  |  |  |  | 3 |  |  |  |
| 1453.64 |  |  |  |  |  |  |  | 11 |  |  |  |
| 1455.89 |  |  |  |  |  |  |  | 6 |  |  |  |
| 1457.86 |  |  |  |  |  |  |  | 7 |  |  |  |
| 1459.80 |  |  |  |  |  |  |  | 1 |  |  |  |
| 1464.88 | 960.3+503.8 | -0.81 |  | 1440.5 |  | 14+24 |  | 14 |  | 0.1 | 25.3 |
| 1468.45 | 960.3+506.3 | -1.83 |  | 1465.3 |  | 17+24 |  | 9 |  | 5.8 | 12.7 |
| 1470.36 | 960.29+509.2 | -0.83 |  | 1443.6 |  | 15+24 |  | 16 |  |  |  |
| 1470.36 | 958.0+506.4 HD | 0.45 |  |  |  |  |  | 16 |  |  |  |
| 1477.19 |  |  |  |  |  |  |  | <1 |  |  |  |
| 1480.58 |  |  |  |  |  |  |  | 4 |  |  |  |
| 1483.16 |  |  |  |  |  |  |  | 8 |  |  |  |
| 1487.55 |  |  |  |  |  |  |  | 3 |  |  |  |
| 1489.60 |  |  |  |  |  |  |  | 1 |  |  |  |
|  |  |  |  | 1494.3 |  | 17+25 |  |  |  | 8.9 | 2.2 |
|  |  |  |  | 1505.6 |  | 12+2*17 |  |  |  | 4.6 | 2 |
| 1516.79 | 446.0+960.3+110.5 | 0.00 |  | 1494.1 |  | 3+12+24 |  | 11 |  | 0.6 | 5.6 |
| 1520.27 |  |  |  |  |  |  |  | 1 |  |  |  |
| 1523.37 |  |  |  |  |  |  |  | 1 |  |  |  |
| 1525.96 |  |  |  |  |  |  |  | <1 |  |  |  |
| 1527.24 |  |  |  |  |  |  |  | 1 |  |  |  |
| 1529.46 |  |  |  |  |  |  |  | <1 |  |  |  |
| 1533.05 |  |  |  |  |  |  |  | 4 |  |  |  |
| 1535.99 |  |  |  |  |  |  |  | 4 |  |  |  |
|  |  |  |  | 1550.9 |  | 3+32 |  |  |  | 3.9 | 4.1 |
| 1560.13 | 672.5+2*446.0 | 4.36 |  |  |  | 2*7+2*12 |  | 9 |  | 4.0 | 12.6 |
| 1565.63 |  |  |  |  |  |  |  | <1 |  |  |  |
| 1567.96 |  |  |  |  |  |  |  | 1 |  |  |  |
| 1569.38 |  |  |  |  |  |  |  | 1 |  |  |  |
| 1576.19 |  |  |  |  |  |  |  | 5 |  |  |  |
|  |  |  |  | 1580.3 |  | 3+17+24 |  |  |  | 1 | 1.7 |
| 1583.70 |  |  |  |  |  |  |  | 2 |  |  |  |
|  |  |  |  | 1584.5 |  | 3+14+25 |  |  |  | 0.1 | 0.6 |
| 1592.30 |  |  |  |  |  |  |  | 4 |  |  |  |
| 1608.59 | 719.4+2*446.0 | 2.84 |  | 1705.8 |  | 2*12+21 |  | 4 |  |  |  |

**Table I b.** Analysis of the LIF spectra of 3,5-DCA(-ND2), continued.

| **osc*=* |  |  |  | Assign | | |  | *I* */I*00 |  | *Icalc* /*I*0cal0 | *Ifit* */I*0fit0 |
| --- | --- | --- | --- | --- | --- | --- | --- | --- | --- | --- | --- |
| *  *00 | [cm-1] | **osc |  | *CISscaled* |  | No |  | 100 |  | 100 | 100 |
|  |  |  |  | 1609.3 |  | 3+17+25 |  |  |  | 1 | 0.4 |
| 1613.33 |  |  |  |  |  |  |  | <1 |  |  |  |
| 1617.92 | 672.5+944.3 | -1.11 |  |  |  | 2*7+25 |  | 2 |  | 8.9 | 4.3 |
| 1620.35 |  |  |  |  |  |  |  | < |  |  |  |
|  |  |  |  | 1620.6 |  | 3+12+2*17 |  |  |  | 0.5 | 0.3 |
| 1622.43 |  |  |  |  |  |  |  | 1 |  |  |  |
| 1632.88 | 672.5+960.3 | -0.12 |  |  |  | 2*7+24 |  | 1 |  | 6.3 | 23.2 |
| 1637.87 |  |  |  |  |  |  |  | 1 |  |  |  |
| 1640.11 |  |  |  |  |  |  |  | 6 |  |  |  |
| 1649.29 |  |  |  |  |  |  |  | <1 |  |  |  |
|  |  |  |  | 1651.4 |  | 17+27 |  |  |  | 0.5 | 0.1 |
| 1665.57 | 719.4+446.0+503.8 | 3.63 |  | 1767.2 |  | 21+12+14 |  | 1 |  |  |  |
| 1665.57 | 719.4+944.3 | -1.82 |  | 1780.7 |  | 21+25 |  | 1 |  |  |  |
| 1669.05 | 719.4+446.0+506.3 | 2.70 |  | 1767.2 |  | 21+12+14 |  | 9 |  |  |  |
| 1669.05 | 672.5+2*446.0+110.5 | 5.93 |  |  |  | 3+2*7+2*12 |  | 9 |  | 0.6 | 2.2 |
| 1677.14 | 719.4+446.0+509.2 | -2.48 |  | 1770.3 |  | 12+15+21 |  | 6 |  |  |  |
| 1682.03 | 719.4+960.3 | -2.33 |  | 1751.7 |  | 21+24 |  | 1 |  |  |  |
| 1683.95 |  |  |  |  |  |  |  | 1 |  |  |  |
| 1685.75 |  |  |  |  |  |  |  | 6 |  |  |  |
